# Supplementary material for: Estimating and interpreting nonlinear receptive field of sensory neural responses with deep neural network models
Source: eLife journal article supplement (doi:10.7554/elife.53445), 2020-06-26

**Dropout ratio vs performance**

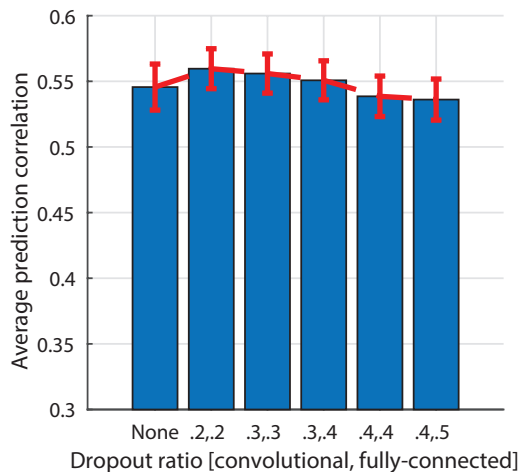

**Extracted feature dimensions vs performance**

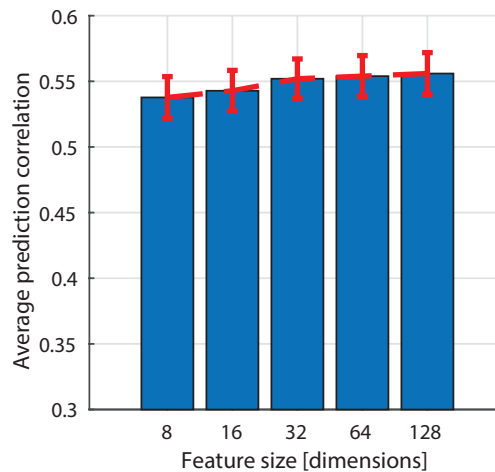

**L2 regularization vs performance**

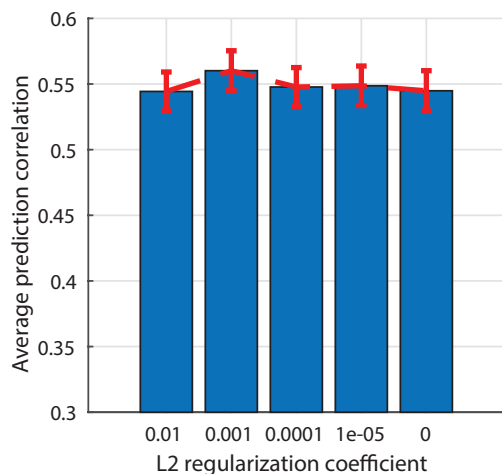

**# of Conv2D layers vs performance**

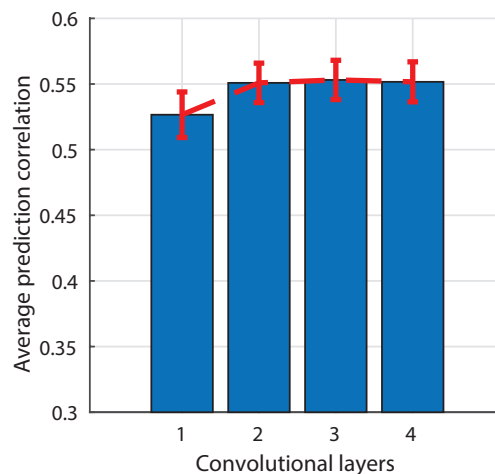

**# of Conv2D kernels vs performance**

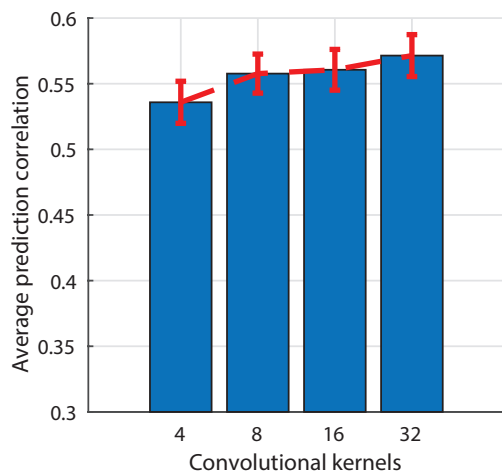

**# of Dense layers vs performance**

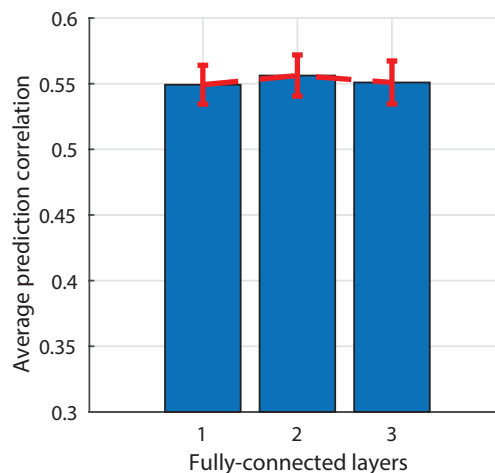

Supplement: supp [file elife_poa_e53445_Figure_1_figure_supplement_2.pdf › elife_poa_e53445_Figure_1_figure_supplement_2.pdf]
