# Supplementary material for: Estimating and interpreting nonlinear receptive field of sensory neural responses with deep neural network models
Source: eLife journal article supplement (doi:10.7554/elife.53445), 2020-06-26

### A. Example of low-hold electrode (4)

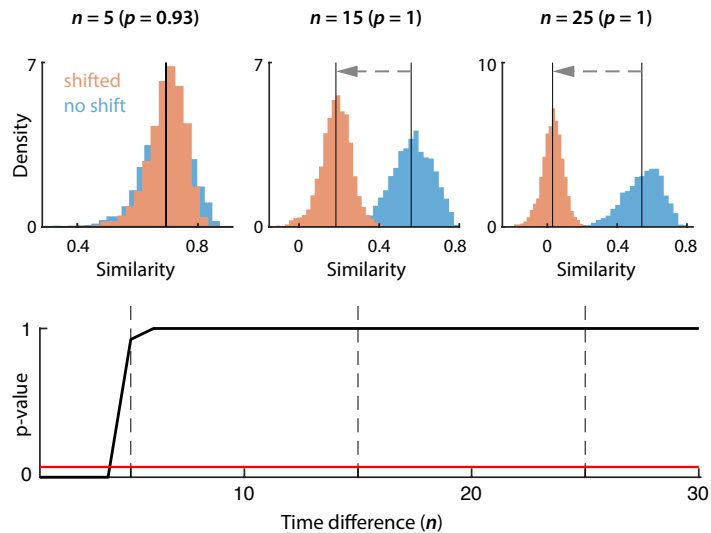

### B. Example of high-hold electrode (24)

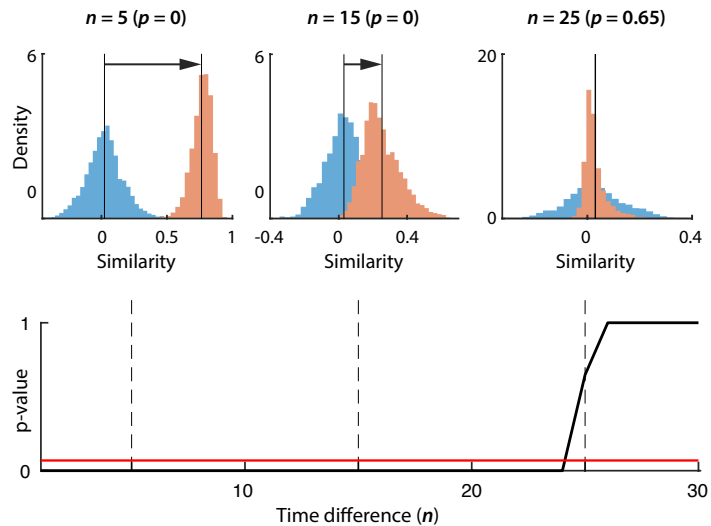

### C. Computing similarity of lagged DSTRF pairs

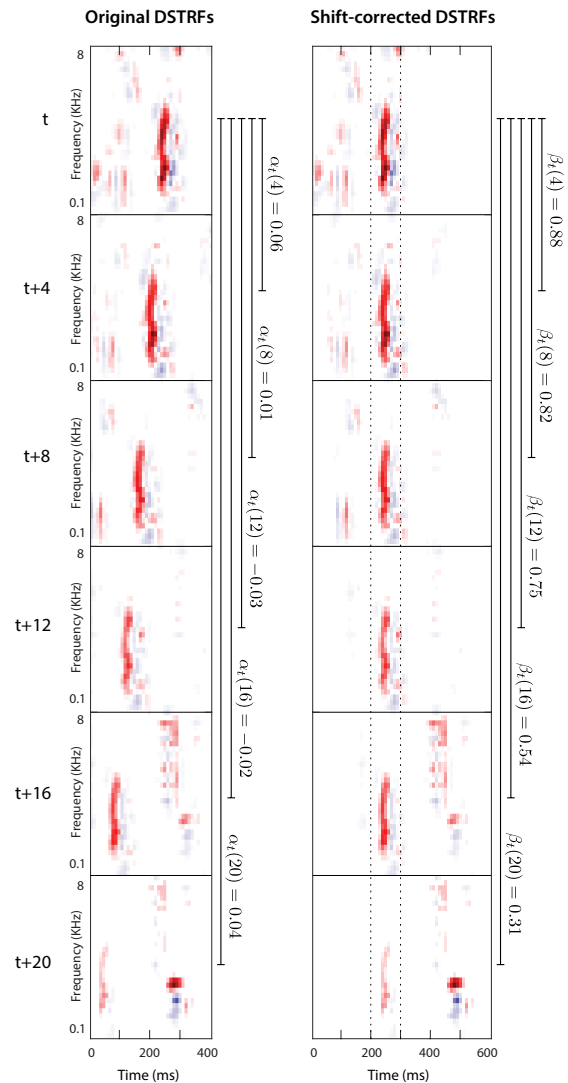

Supplement: supp [file elife_poa_e53445_Figure_3_figure_supplement_1.pdf › elife_poa_e53445_Figure_3_figure_supplement_1.pdf]
