# Supplementary figures and images for: Estimating and interpreting nonlinear receptive field of sensory neural responses with deep neural network models
Source: eLife journal article supplement (doi:10.7554/elife.53445), 2020-06-26

### Context window vs performance

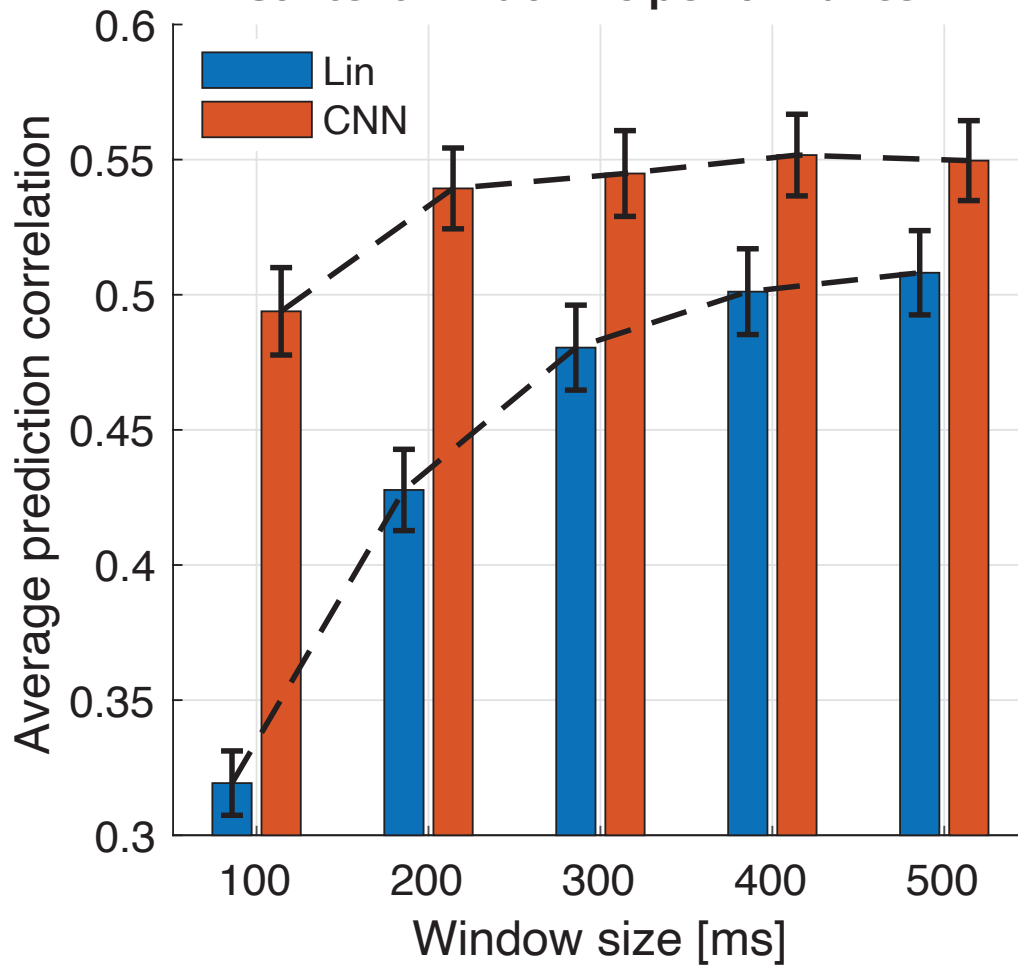

Supplement: supp [file elife_poa_e53445_Figure_1_figure_supplement_1.pdf › elife_poa_e53445_Figure_1_figure_supplement_1.pdf]

## A. 1D convolution to matrix multiplication

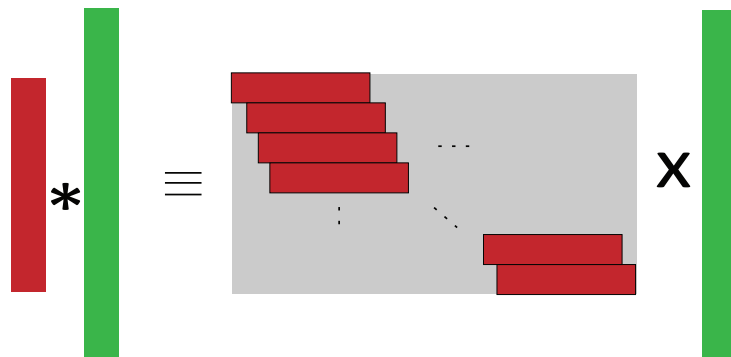

## B. 2D convolution to matrix multiplication

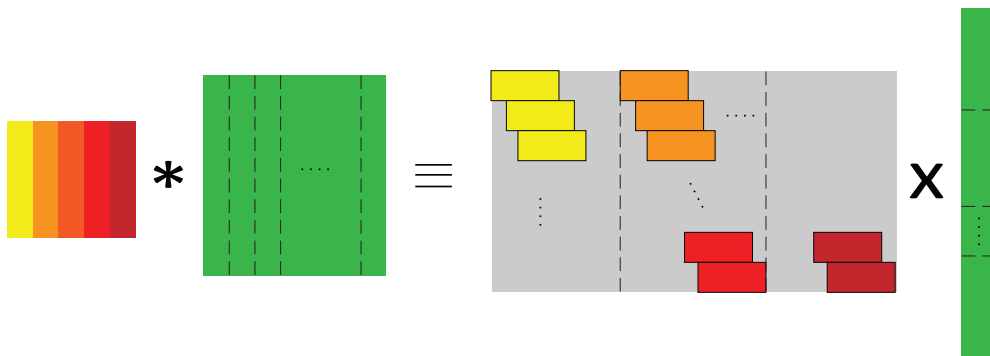

Supplement: supp [file elife_poa_e53445_Figure_2_figure_supplement_1.pdf › elife_poa_e53445_Figure_2_figure_supplement_1.pdf]

**A.** DSTRF robustness distribution

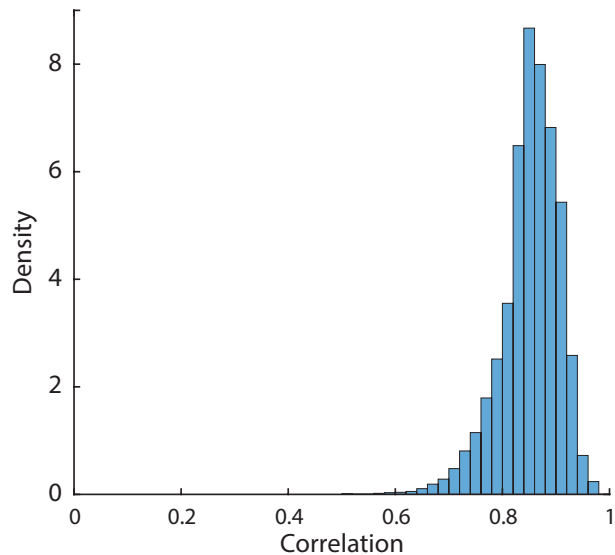

**B.** DSTRF robustness as a function of gain

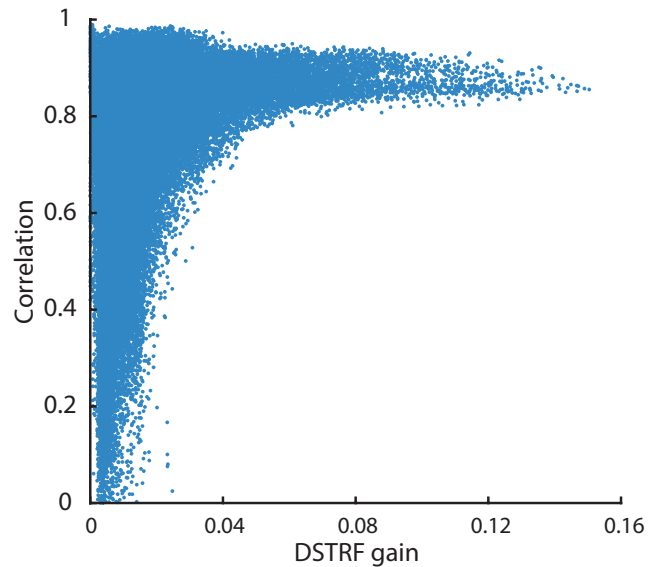

Supplement: supp [file elife_poa_e53445_Figure_2_figure_supplement_2.pdf › elife_poa_e53445_Figure_2_figure_supplement_2.pdf]

**A.** Correlation of STRF and average DSTRF

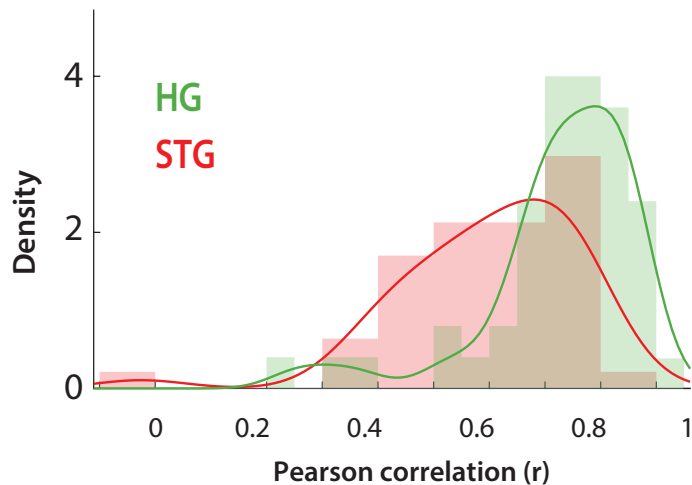

**B.** STRF/DSTRF similarity vs complexity

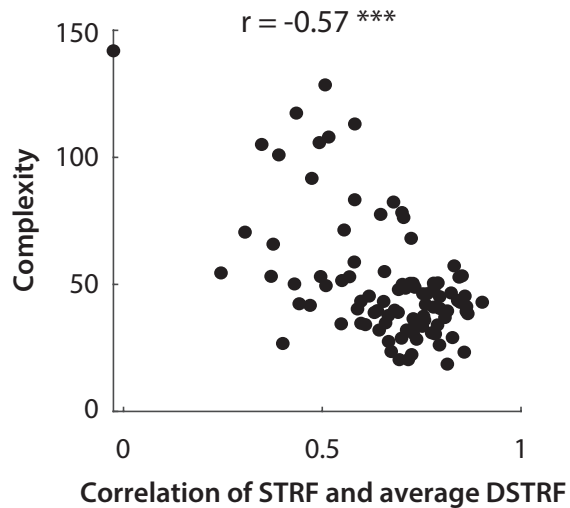

Supplement: supp [file elife_poa_e53445_Figure_2_figure_supplement_3.pdf › elife_poa_e53445_Figure_2_figure_supplement_3.pdf]

**A. Training split**

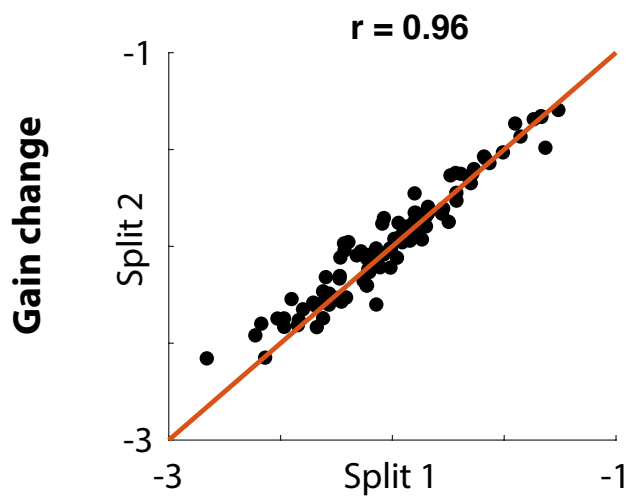

**B. Test split**

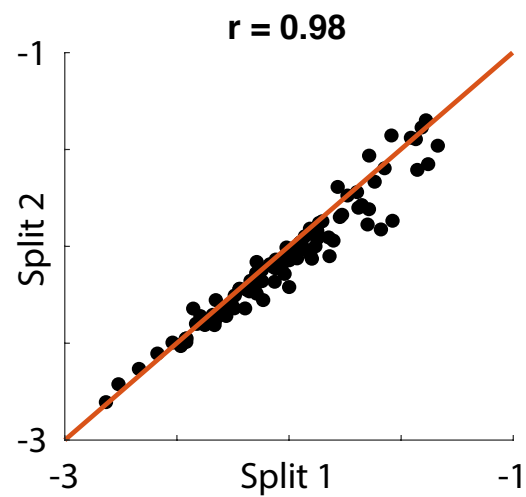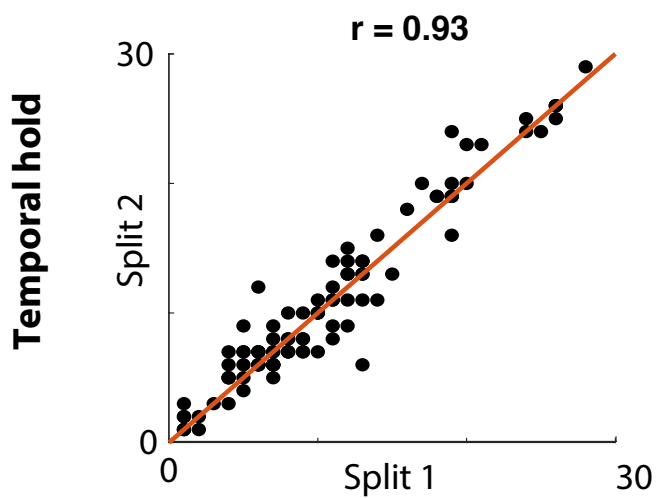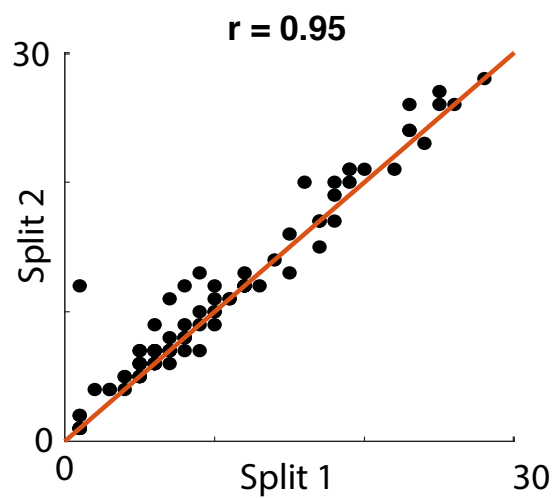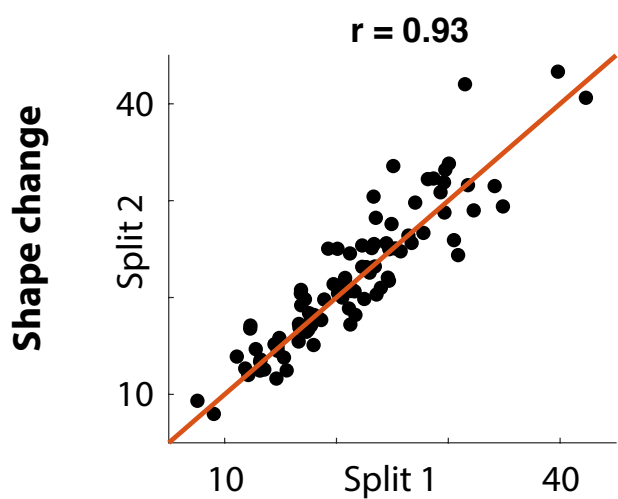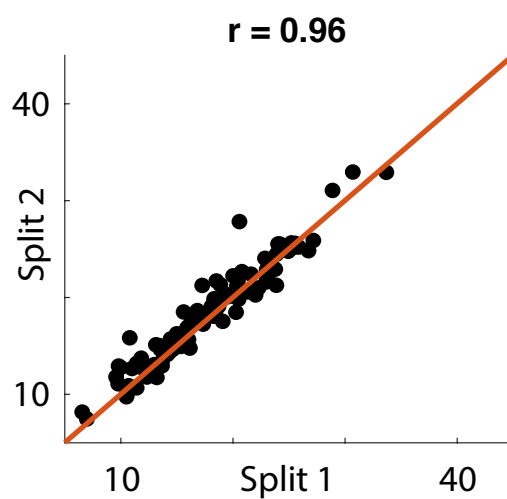

Supplement: supp [file elife_poa_e53445_Figure_3_figure_supplement_2.pdf › elife_poa_e53445_Figure_3_figure_supplement_2.pdf]

## A. Predicting network complexity

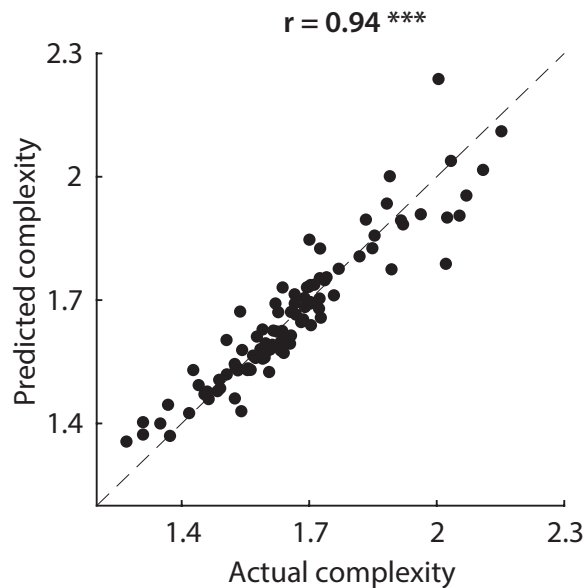

## B. Predicting improved model accuracy

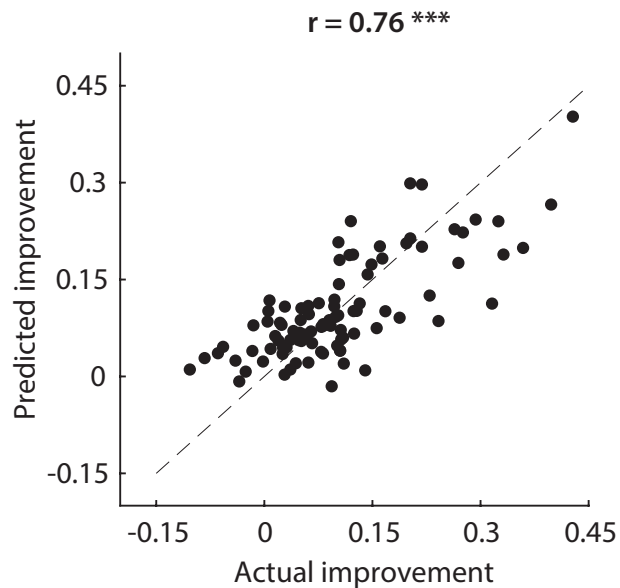

Supplement: supp [file elife_poa_e53445_Figure_5_figure_supplement_1.pdf › elife_poa_e53445_Figure_5_figure_supplement_1.pdf]

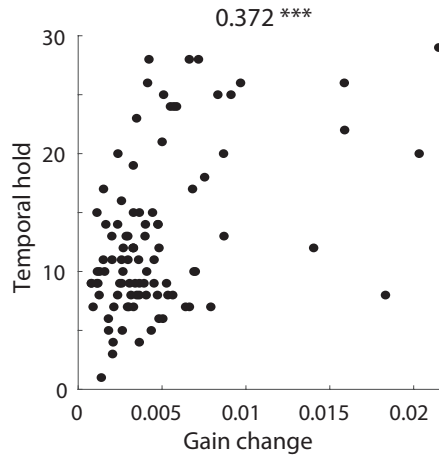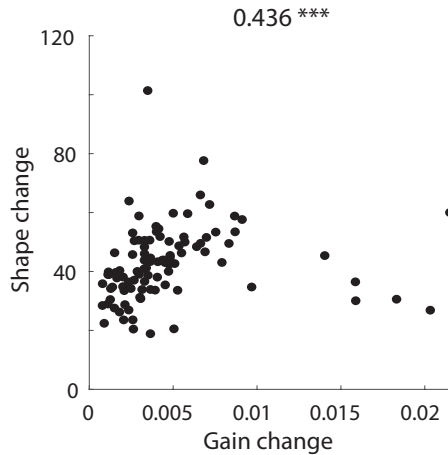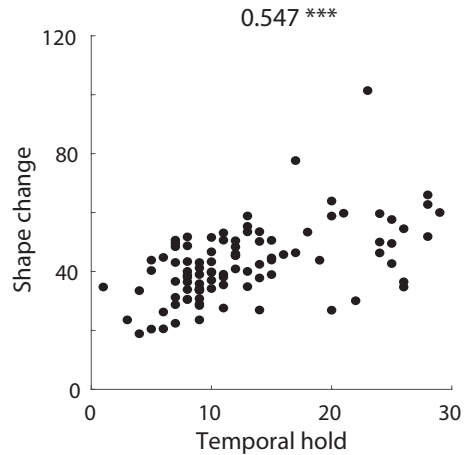

Supplement: supp [file elife_poa_e53445_Figure_5_figure_supplement_2.pdf › elife_poa_e53445_Figure_5_figure_supplement_2.pdf]
